# Supplementary material
Source: HighWire-hosted journal article supplement (http://dmd.aspetjournals.org/highwire/filestream/66136/field_highwire_adjunct_files/0/Supplemental_DataFinal.pdf)
Supplement: Supplemental_DataFinal.pdf [file Supplemental_DataFinal.pdf]

DMD #40329

**Supplemental data for**

***In silico and in vitro* identification of microRNAs that regulate HNF4A expression.**

Anuradha Ramamoorthy, Lang Li, Andrea Gaedigk, L. DiAnne Bradford, Eric A. Benson, David

A. Flockhart, and Todd C. Skaar

Submitted to Drug Metabolism and Disposition

**Supplemental Figures:**

**Supplemental Figure 1: Regulatory elements in the 3'-UTR of HNF4A. (A)**

Schematic representation of the pIS-HNF4A vector. (B) Transfection of HeLa cell line with 200ng of pIS-0 (control) or pIS-HNF4A plasmids. *Renilla* luciferase plasmid was used as an internal control. Dual luciferase assays were performed 24 hr after transfection. The transfections were performed in triplicate on three different days. Data are expressed as the pIS-HNF4A luciferase activity corrected for *Renilla* luciferase and normalized to pIS-0 within each experiment (mean  $\pm$  SEM; n=3 independent experiments). \*\* indicates  $p < .001$ .

**Supplemental Figure 1**

**(A)**

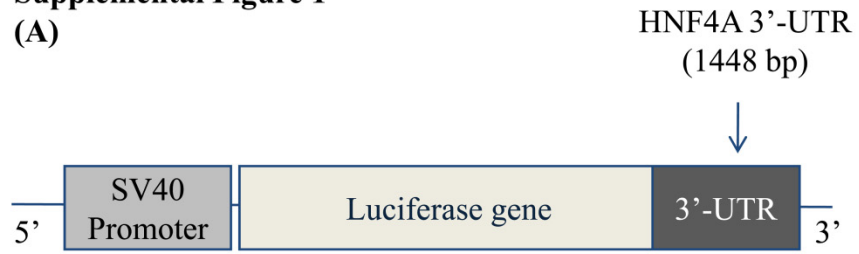

**(B)**

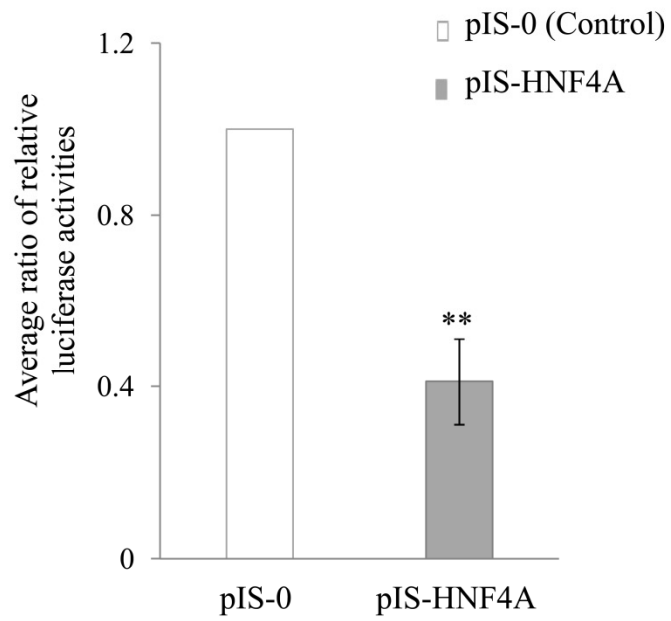

**Supplemental Figure 2: miRNA expression in cells transfected with miRNAs.**

HepG2 cells were transfected with cel-miR-67 (control), hsa-miR-34a, or hsa-miR-449a.

MiRNA expression (A) hsa-miR-34a and (B) hsa-miR-449a were measured by TaqMan assays.

Quantities are expressed relative to the cel-miR-67 transfected cells.

**Supplemental Figure 2**

**(A)**

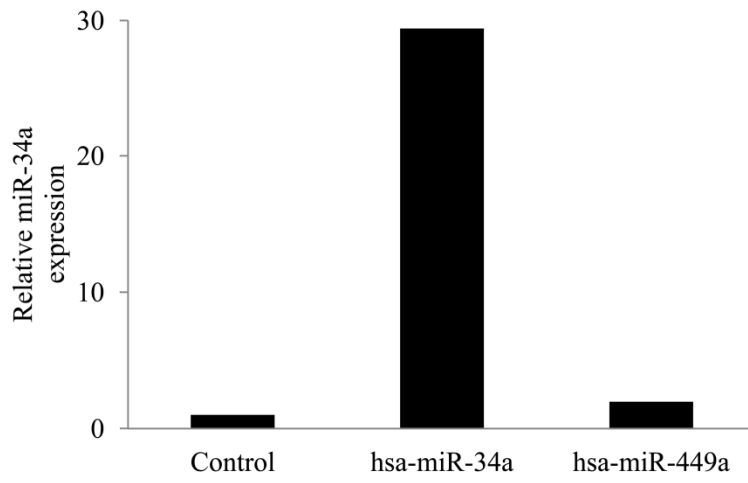

**(B)**

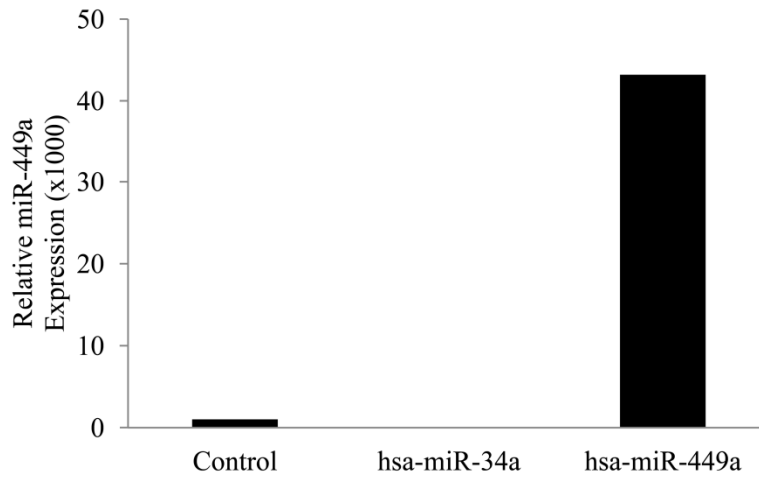

**Supplemental Figure 3: Secondary structure prediction.** Secondary structures of wildtype and variant HNF4A mRNAs were predicted using RNAFold (Gruber et al., 2008). A 70 bp sequence flanking the nucleotide on either side of the SNP (rs11574744) was used to assess the minimum folding energy and secondary structure. The wildtype and variant nucleotides are highlighted.



**Supplemental Tables:****Supplemental Table 1: MiRNAs predicted to target the 3'-UTR of *HNF4A*.**

| RefSeq<br>Gene ID <sup>a</sup> | 3'-<br>UTR<br>length<br>(bp) | Bioinformatic Programs <sup>b, c</sup> |         |                |       |      | Total no. of<br>unique<br>miRNAs <sup>d</sup> | Overlap <sup>e</sup> |
|--------------------------------|------------------------------|----------------------------------------|---------|----------------|-------|------|-----------------------------------------------|----------------------|
|                                |                              | miRBase<br>Targets                     | miRanda | Target<br>Scan | RNA22 | PITA |                                               |                      |
| NM_000<br>457                  | 1724                         | 11                                     | 12      | 112            | 251   | 63   | 350                                           | 99                   |

**Footnotes:** <sup>a</sup> RefSeq Gene id is taken from UCSC Genome browser; <sup>b</sup> PicTar predictions are not included in the table as *HNF4A* does not appear to be a part of the program's database; <sup>c</sup> Versions of the bioinformatic programs: miRBase Targets using miRBase release 11.0, miRanda and TargetScan version 4.2 uses miRBase release 10.0, and for RNA22, we used miRBase release 10.0, PITA uses miRBase release 9.0; <sup>d</sup> Total number of unique miRNAs predicted by at least one program; <sup>e</sup> Total number of miRNAs predicted to target *HNF4A* by at least 2 programs.



**Supplementary Table 2: List of miRNAs predicted by different bioinformatic algorithms to target the 3'-UTR of HNF4A.** Note: versions of the bioinformatic programs: for miRBase

Targets we used miRBase release 11.0, miRanda and TargetScan version 4.2 using miRBase release 10.0, and for RNA22, we used miRBase release 10.0, PITA uses miRBase release 9.0.

PicTar predictions are not included in the table as HNF4A does not appear to be a part of the program's database.

## DMD#40329

| miRbase Targets | miRanda      | TargetScan     | RNA22         | PITA           | Overlap between two or more algorithms |
|-----------------|--------------|----------------|---------------|----------------|----------------------------------------|
| hsa-miR-143     | hsa-miR-29b  | hsa-miR-1      | hsa-let-7a    | hsa-miR-132    | hsa-miR-125a                           |
| hsa-miR-18a     | hsa-miR-133a | hsa-miR-125a   | hsa-let-7b    | hsa-miR-134    | hsa-miR-130b                           |
| hsa-miR-18b     | hsa-miR-133b | hsa-miR-125b   | hsa-let-7c    | hsa-miR-198    | hsa-miR-132                            |
| hsa-miR-197     | hsa-miR-198  | hsa-miR-130a   | hsa-let-7d    | hsa-miR-200a*  | hsa-miR-133a                           |
| hsa-miR-340     | hsa-miR-214  | hsa-miR-130b   | hsa-let-7e    | hsa-miR-203    | hsa-miR-133b                           |
| hsa-miR-34b     | hsa-miR-24   | hsa-miR-133a   | hsa-let-7g    | hsa-miR-205    | hsa-miR-134                            |
| hsa-miR-382     | hsa-miR-296  | hsa-miR-133b   | hsa-let-7i    | hsa-miR-212    | hsa-miR-143                            |
| hsa-miR-512-5p  | hsa-miR-302c | hsa-miR-143    | hsa-miR-103   | hsa-miR-214    | hsa-miR-150                            |
| hsa-miR-554     | hsa-miR-326  | hsa-miR-146a   | hsa-miR-107   | hsa-miR-220    | hsa-miR-154                            |
| hsa-miR-613     | hsa-miR-337  | hsa-miR-146b   | hsa-miR-10a   | hsa-miR-224    | hsa-miR-17-3p                          |
| hsa-miR-766     | hsa-miR-378  | hsa-miR-147    | hsa-miR-122a  | hsa-miR-28     | hsa-miR-18a                            |
|                 | hsa-miR-412  | hsa-miR-148a   | hsa-miR-125a  | hsa-miR-296    | hsa-miR-18b                            |
|                 |              | hsa-miR-148b   | hsa-miR-126*  | hsa-miR-299-5p | hsa-miR-194                            |
|                 |              | hsa-miR-150    | hsa-miR-127   | hsa-miR-302b*  | hsa-miR-195                            |
|                 |              | hsa-miR-151    | hsa-miR-128a  | hsa-miR-302c*  | hsa-miR-197                            |
|                 |              | hsa-miR-152    | hsa-miR-128b  | hsa-miR-337    | hsa-miR-198                            |
|                 |              | hsa-miR-154    | hsa-miR-129   | hsa-miR-340    | hsa-miR-200a*                          |
|                 |              | hsa-miR-15a    | hsa-miR-130b  | hsa-miR-342    | hsa-miR-205                            |
|                 |              | hsa-miR-15b    | hsa-miR-132   | hsa-miR-34b    | hsa-miR-206                            |
|                 |              | hsa-miR-16     | hsa-miR-133a  | hsa-miR-378    | hsa-miR-21                             |
|                 |              | hsa-miR-17-3p  | hsa-miR-133b  | hsa-miR-382    | hsa-miR-212                            |
|                 |              | hsa-miR-185    | hsa-miR-134   | hsa-miR-384    | hsa-miR-214                            |
|                 |              | hsa-miR-18a    | hsa-miR-135a  | hsa-miR-411    | hsa-miR-220                            |
|                 |              | hsa-miR-18b    | hsa-miR-135b  | hsa-miR-412    | hsa-miR-24                             |
|                 |              | hsa-miR-194    | hsa-miR-136   | hsa-miR-452*   | hsa-miR-28                             |
|                 |              | hsa-miR-195    | hsa-miR-140   | hsa-miR-453    | hsa-miR-296                            |
|                 |              | hsa-miR-197    | hsa-miR-143   | hsa-miR-485-3p | hsa-miR-299-5p                         |
|                 |              | hsa-miR-205    | hsa-miR-144   | hsa-miR-491    | hsa-miR-29b                            |
|                 |              | hsa-miR-206    | hsa-miR-145   | hsa-miR-493-3p | hsa-miR-29c                            |
|                 |              | hsa-miR-208    | hsa-miR-149   | hsa-miR-503    | hsa-miR-302c                           |
|                 |              | hsa-miR-21     | hsa-miR-150   | hsa-miR-511    | hsa-miR-302c*                          |
|                 |              | hsa-miR-214    | hsa-miR-154   | hsa-miR-512-5p | hsa-miR-326                            |
|                 |              | hsa-miR-24     | hsa-miR-17-3p | hsa-miR-513    | hsa-miR-328                            |
|                 |              | hsa-miR-26a    | hsa-miR-181b  | hsa-miR-516-3p | hsa-miR-337                            |
|                 |              | hsa-miR-26b    | hsa-miR-181d  | hsa-miR-518c*  | hsa-miR-338                            |
|                 |              | hsa-miR-299-5p | hsa-miR-182   | hsa-miR-532    | hsa-miR-340                            |
|                 |              | hsa-miR-29a    | hsa-miR-182*  | hsa-miR-542-5p | hsa-miR-342                            |
|                 |              | hsa-miR-29b    | hsa-miR-184   | hsa-miR-545    | hsa-miR-346                            |
|                 |              | hsa-miR-29c    | hsa-miR-187   | hsa-miR-558    | hsa-miR-34a                            |
|                 |              | hsa-miR-301    | hsa-miR-188   | hsa-miR-585    | hsa-miR-34b                            |
|                 |              | hsa-miR-326    | hsa-miR-189   | hsa-miR-590    | hsa-miR-34c                            |
|                 |              | hsa-miR-328    | hsa-miR-18a*  | hsa-miR-593    | hsa-miR-361                            |
|                 |              | hsa-miR-337    | hsa-miR-191*  | hsa-miR-597    | hsa-miR-370                            |
|                 |              | hsa-miR-338    | hsa-miR-193b  | hsa-miR-608    | hsa-miR-378                            |
|                 |              | hsa-miR-346    | hsa-miR-194   | hsa-miR-613    | hsa-miR-382                            |
|                 |              | hsa-miR-34a    | hsa-miR-195   | hsa-miR-615    | hsa-miR-384                            |
|                 |              | hsa-miR-34b    | hsa-miR-196a  | hsa-miR-617    | hsa-miR-412                            |
|                 |              | hsa-miR-34c    | hsa-miR-196b  | hsa-miR-624    | hsa-miR-449                            |
|                 |              | hsa-miR-361    | hsa-miR-197   | hsa-miR-629    | hsa-miR-449b                           |
|                 |              | hsa-miR-370    | hsa-miR-198   | hsa-miR-636    | hsa-miR-453                            |
|                 |              | hsa-miR-378    | hsa-miR-199a  | hsa-miR-637    | hsa-miR-454-3p                         |
|                 |              | hsa-miR-382    | hsa-miR-199a* | hsa-miR-640    | hsa-miR-484                            |
|                 |              | hsa-miR-383    | hsa-miR-199b  | hsa-miR-642    | hsa-miR-485-3p                         |
|                 |              | hsa-miR-384    | hsa-miR-200a* | hsa-miR-650    | hsa-miR-485-5p                         |
|                 |              | hsa-miR-412    | hsa-miR-202   | hsa-miR-658    | hsa-miR-491                            |
|                 |              | hsa-miR-421    | hsa-miR-202*  | hsa-miR-659    | hsa-miR-493-3p                         |
|                 |              | hsa-miR-421-3p | hsa-miR-204   | hsa-miR-661    | hsa-miR-497                            |
|                 |              | hsa-miR-424    | hsa-miR-205   | hsa-miR-671    | hsa-miR-503                            |
|                 |              | hsa-miR-433-5p | hsa-miR-206   | hsa-miR-765    | hsa-miR-511                            |
|                 |              | hsa-miR-449    | hsa-miR-20a   | hsa-miR-766    | hsa-miR-512-5p                         |
|                 |              | hsa-miR-449b   | hsa-miR-21    | hsa-miR-767-5p | hsa-miR-513                            |

## DMD#40329

| miRbase Targets | miRanda | TargetScan     | RNA22          | PITA           | Overlap between two or more algorithms |
|-----------------|---------|----------------|----------------|----------------|----------------------------------------|
|                 |         | hsa-miR-454-3p | hsa-miR-210    | hsa-miR-768-5p | hsa-miR-515-3p                         |
|                 |         | hsa-miR-484    | hsa-miR-211    | hsa-miR-801    | hsa-miR-518c*                          |
|                 |         | hsa-miR-485-5p | hsa-miR-212    |                | hsa-miR-520g                           |
|                 |         | hsa-miR-490    | hsa-miR-214    |                | hsa-miR-520h                           |
|                 |         | hsa-miR-493-3p | hsa-miR-217    |                | hsa-miR-525                            |
|                 |         | hsa-miR-497    | hsa-miR-218    |                | hsa-miR-526a                           |
|                 |         | hsa-miR-499    | hsa-miR-22     |                | hsa-miR-526c                           |
|                 |         | hsa-miR-504    | hsa-miR-220    |                | hsa-miR-532                            |
|                 |         | hsa-miR-505    | hsa-miR-221    |                | hsa-miR-545                            |
|                 |         | hsa-miR-512-5p | hsa-miR-222    |                | hsa-miR-554                            |
|                 |         | hsa-miR-513    | hsa-miR-24     |                | hsa-miR-575                            |
|                 |         | hsa-miR-515-3p | hsa-miR-27a    |                | hsa-miR-590                            |
|                 |         | hsa-miR-519e   | hsa-miR-27b    |                | hsa-miR-593                            |
|                 |         | hsa-miR-520f   | hsa-miR-28     |                | hsa-miR-597                            |
|                 |         | hsa-miR-520g   | hsa-miR-29b    |                | hsa-miR-608                            |
|                 |         | hsa-miR-520h   | hsa-miR-29c    |                | hsa-miR-613                            |
|                 |         | hsa-miR-525    | hsa-miR-302a   |                | hsa-miR-615                            |
|                 |         | hsa-miR-526a   | hsa-miR-302b   |                | hsa-miR-624                            |
|                 |         | hsa-miR-526c   | hsa-miR-302c   |                | hsa-miR-629                            |
|                 |         | hsa-miR-532    | hsa-miR-302c*  |                | hsa-miR-631                            |
|                 |         | hsa-miR-539    | hsa-miR-302d   |                | hsa-miR-636                            |
|                 |         | hsa-miR-542-3p | hsa-miR-30a-3p |                | hsa-miR-637                            |
|                 |         | hsa-miR-545    | hsa-miR-30e-3p |                | hsa-miR-640                            |
|                 |         | hsa-miR-548c   | hsa-miR-30e-5p |                | hsa-miR-642                            |
|                 |         | hsa-miR-551a   | hsa-miR-31     |                | hsa-miR-650                            |
|                 |         | hsa-miR-551b   | hsa-miR-324-3p |                | hsa-miR-658                            |
|                 |         | hsa-miR-575    | hsa-miR-324-5p |                | hsa-miR-659                            |
|                 |         | hsa-miR-579    | hsa-miR-325    |                | hsa-miR-661                            |
|                 |         | hsa-miR-590    | hsa-miR-326    |                | hsa-miR-663                            |
|                 |         | hsa-miR-613    | hsa-miR-328    |                | hsa-miR-668                            |
|                 |         | hsa-miR-616    | hsa-miR-331    |                | hsa-miR-671                            |
|                 |         | hsa-miR-620    | hsa-miR-337    |                | hsa-miR-765                            |
|                 |         | hsa-miR-625    | hsa-miR-338    |                | hsa-miR-766                            |
|                 |         | hsa-miR-631    | hsa-miR-339    |                | hsa-miR-767-5p                         |
|                 |         | hsa-miR-633    | hsa-miR-340    |                | hsa-miR-768-5p                         |
|                 |         | hsa-miR-634    | hsa-miR-342    |                | hsa-miR-769-5p                         |
|                 |         | hsa-miR-637    | hsa-miR-345    |                | hsa-miR-801                            |
|                 |         | hsa-miR-640    | hsa-miR-346    |                | hsa-miR-9                              |
|                 |         | hsa-miR-641    | hsa-miR-34a    |                |                                        |
|                 |         | hsa-miR-642    | hsa-miR-34b    |                |                                        |
|                 |         | hsa-miR-650    | hsa-miR-34c    |                |                                        |
|                 |         | hsa-miR-660    | hsa-miR-361    |                |                                        |
|                 |         | hsa-miR-661    | hsa-miR-362    |                |                                        |
|                 |         | hsa-miR-663    | hsa-miR-370    |                |                                        |
|                 |         | hsa-miR-668    | hsa-miR-373    |                |                                        |
|                 |         | hsa-miR-671    | hsa-miR-375    |                |                                        |
|                 |         | hsa-miR-765    | hsa-miR-378    |                |                                        |
|                 |         | hsa-miR-766    | hsa-miR-382    |                |                                        |
|                 |         | hsa-miR-768-5p | hsa-miR-412    |                |                                        |
|                 |         | hsa-miR-769-5p | hsa-miR-422a   |                |                                        |
|                 |         | hsa-miR-9      | hsa-miR-422b   |                |                                        |
|                 |         |                | hsa-miR-423    |                |                                        |
|                 |         |                | hsa-miR-425-3p |                |                                        |
|                 |         |                | hsa-miR-431    |                |                                        |
|                 |         |                | hsa-miR-432    |                |                                        |
|                 |         |                | hsa-miR-432*   |                |                                        |
|                 |         |                | hsa-miR-433    |                |                                        |
|                 |         |                | hsa-miR-448    |                |                                        |
|                 |         |                | hsa-miR-449    |                |                                        |
|                 |         |                | hsa-miR-449b   |                |                                        |
|                 |         |                | hsa-miR-450    |                |                                        |

## DMD#40329

| miRbase Targets | miRanda | TargetScan | RNA22          | PITA | Overlap between two or more algorithms |
|-----------------|---------|------------|----------------|------|----------------------------------------|
|                 |         |            | hsa-miR-452    |      |                                        |
|                 |         |            | hsa-miR-453    |      |                                        |
|                 |         |            | hsa-miR-454-3p |      |                                        |
|                 |         |            | hsa-miR-455    |      |                                        |
|                 |         |            | hsa-miR-483    |      |                                        |
|                 |         |            | hsa-miR-484    |      |                                        |
|                 |         |            | hsa-miR-485-3p |      |                                        |
|                 |         |            | hsa-miR-485-5p |      |                                        |
|                 |         |            | hsa-miR-486    |      |                                        |
|                 |         |            | hsa-miR-491    |      |                                        |
|                 |         |            | hsa-miR-493-3p |      |                                        |
|                 |         |            | hsa-miR-497    |      |                                        |
|                 |         |            | hsa-miR-501    |      |                                        |
|                 |         |            | hsa-miR-502    |      |                                        |
|                 |         |            | hsa-miR-503    |      |                                        |
|                 |         |            | hsa-miR-506    |      |                                        |
|                 |         |            | hsa-miR-508    |      |                                        |
|                 |         |            | hsa-miR-509    |      |                                        |
|                 |         |            | hsa-miR-510    |      |                                        |
|                 |         |            | hsa-miR-511    |      |                                        |
|                 |         |            | hsa-miR-512-5p |      |                                        |
|                 |         |            | hsa-miR-515-3p |      |                                        |
|                 |         |            | hsa-miR-515-5p |      |                                        |
|                 |         |            | hsa-miR-516-5p |      |                                        |
|                 |         |            | hsa-miR-517*   |      |                                        |
|                 |         |            | hsa-miR-517a   |      |                                        |
|                 |         |            | hsa-miR-517b   |      |                                        |
|                 |         |            | hsa-miR-518a   |      |                                        |
|                 |         |            | hsa-miR-518c*  |      |                                        |
|                 |         |            | hsa-miR-518e   |      |                                        |
|                 |         |            | hsa-miR-518f*  |      |                                        |
|                 |         |            | hsa-miR-519a   |      |                                        |
|                 |         |            | hsa-miR-519d   |      |                                        |
|                 |         |            | hsa-miR-519e*  |      |                                        |
|                 |         |            | hsa-miR-520a*  |      |                                        |
|                 |         |            | hsa-miR-520b   |      |                                        |
|                 |         |            | hsa-miR-520g   |      |                                        |
|                 |         |            | hsa-miR-520h   |      |                                        |
|                 |         |            | hsa-miR-524    |      |                                        |
|                 |         |            | hsa-miR-525    |      |                                        |
|                 |         |            | hsa-miR-525*   |      |                                        |
|                 |         |            | hsa-miR-526a   |      |                                        |
|                 |         |            | hsa-miR-526b   |      |                                        |
|                 |         |            | hsa-miR-526b*  |      |                                        |
|                 |         |            | hsa-miR-526c   |      |                                        |
|                 |         |            | hsa-miR-532    |      |                                        |
|                 |         |            | hsa-miR-545    |      |                                        |
|                 |         |            | hsa-miR-550    |      |                                        |
|                 |         |            | hsa-miR-554    |      |                                        |
|                 |         |            | hsa-miR-557    |      |                                        |
|                 |         |            | hsa-miR-564    |      |                                        |
|                 |         |            | hsa-miR-565    |      |                                        |
|                 |         |            | hsa-miR-566    |      |                                        |
|                 |         |            | hsa-miR-571    |      |                                        |
|                 |         |            | hsa-miR-572    |      |                                        |
|                 |         |            | hsa-miR-573    |      |                                        |
|                 |         |            | hsa-miR-574    |      |                                        |
|                 |         |            | hsa-miR-575    |      |                                        |
|                 |         |            | hsa-miR-578    |      |                                        |
|                 |         |            | hsa-miR-580    |      |                                        |
|                 |         |            | hsa-miR-581    |      |                                        |

## DMD#40329

| miRbase Targets | miRanda | TargetScan | RNA22          | PITA | Overlap between two or more algorithms |
|-----------------|---------|------------|----------------|------|----------------------------------------|
|                 |         |            | hsa-miR-584    |      |                                        |
|                 |         |            | hsa-miR-586    |      |                                        |
|                 |         |            | hsa-miR-587    |      |                                        |
|                 |         |            | hsa-miR-589    |      |                                        |
|                 |         |            | hsa-miR-591    |      |                                        |
|                 |         |            | hsa-miR-593    |      |                                        |
|                 |         |            | hsa-miR-594    |      |                                        |
|                 |         |            | hsa-miR-595    |      |                                        |
|                 |         |            | hsa-miR-596    |      |                                        |
|                 |         |            | hsa-miR-597    |      |                                        |
|                 |         |            | hsa-miR-598    |      |                                        |
|                 |         |            | hsa-miR-600    |      |                                        |
|                 |         |            | hsa-miR-601    |      |                                        |
|                 |         |            | hsa-miR-602    |      |                                        |
|                 |         |            | hsa-miR-608    |      |                                        |
|                 |         |            | hsa-miR-609    |      |                                        |
|                 |         |            | hsa-miR-611    |      |                                        |
|                 |         |            | hsa-miR-612    |      |                                        |
|                 |         |            | hsa-miR-613    |      |                                        |
|                 |         |            | hsa-miR-614    |      |                                        |
|                 |         |            | hsa-miR-615    |      |                                        |
|                 |         |            | hsa-miR-619    |      |                                        |
|                 |         |            | hsa-miR-622    |      |                                        |
|                 |         |            | hsa-miR-623    |      |                                        |
|                 |         |            | hsa-miR-624    |      |                                        |
|                 |         |            | hsa-miR-626    |      |                                        |
|                 |         |            | hsa-miR-628    |      |                                        |
|                 |         |            | hsa-miR-629    |      |                                        |
|                 |         |            | hsa-miR-631    |      |                                        |
|                 |         |            | hsa-miR-632    |      |                                        |
|                 |         |            | hsa-miR-636    |      |                                        |
|                 |         |            | hsa-miR-637    |      |                                        |
|                 |         |            | hsa-miR-638    |      |                                        |
|                 |         |            | hsa-miR-639    |      |                                        |
|                 |         |            | hsa-miR-640    |      |                                        |
|                 |         |            | hsa-miR-642    |      |                                        |
|                 |         |            | hsa-miR-643    |      |                                        |
|                 |         |            | hsa-miR-644    |      |                                        |
|                 |         |            | hsa-miR-645    |      |                                        |
|                 |         |            | hsa-miR-646    |      |                                        |
|                 |         |            | hsa-miR-647    |      |                                        |
|                 |         |            | hsa-miR-648    |      |                                        |
|                 |         |            | hsa-miR-650    |      |                                        |
|                 |         |            | hsa-miR-652    |      |                                        |
|                 |         |            | hsa-miR-653    |      |                                        |
|                 |         |            | hsa-miR-654    |      |                                        |
|                 |         |            | hsa-miR-657    |      |                                        |
|                 |         |            | hsa-miR-658    |      |                                        |
|                 |         |            | hsa-miR-659    |      |                                        |
|                 |         |            | hsa-miR-662    |      |                                        |
|                 |         |            | hsa-miR-663    |      |                                        |
|                 |         |            | hsa-miR-668    |      |                                        |
|                 |         |            | hsa-miR-671    |      |                                        |
|                 |         |            | hsa-miR-7      |      |                                        |
|                 |         |            | hsa-miR-758    |      |                                        |
|                 |         |            | hsa-miR-765    |      |                                        |
|                 |         |            | hsa-miR-766    |      |                                        |
|                 |         |            | hsa-miR-767-3p |      |                                        |
|                 |         |            | hsa-miR-767-5p |      |                                        |
|                 |         |            | hsa-miR-768-5p |      |                                        |
|                 |         |            | hsa-miR-769-3p |      |                                        |

DMD#40329

| miRbase Targets | miRanda | TargetScan | RNA22          | PITA | Overlap between two or more algorithms |
|-----------------|---------|------------|----------------|------|----------------------------------------|
|                 |         |            | hsa-miR-769-5p |      |                                        |
|                 |         |            | hsa-miR-770-5p |      |                                        |
|                 |         |            | hsa-miR-801    |      |                                        |
|                 |         |            | hsa-miR-9      |      |                                        |
|                 |         |            | hsa-miR-92     |      |                                        |
|                 |         |            | hsa-miR-92b    |      |                                        |
|                 |         |            | hsa-miR-96     |      |                                        |

**Supplemental Table 3: *HNF4A* 3'-UTR SNPs predicted to destroy or create a miRNA target site.**

| dbSNP rs # | Minor allele frequency (%) | Seed sequence<br>[ <u>Wildtype</u> /<br>Derived allele] | Old target destroyed        | New target created |
|------------|----------------------------|---------------------------------------------------------|-----------------------------|--------------------|
| rs11574744 | 0-4.0 <sup>a</sup>         | AC[ <u>T</u> /A]GCCA                                    | -34a, -34c,<br>-449a, -449b |                    |
| rs11574745 | 0-2.5                      | A[ <u>C</u> /T]CTTCA                                    | -493-3p                     |                    |
| rs6130615  | 11-61 <sup>a</sup>         | TAATG[ <u>C</u> /T]G                                    |                             | -323               |
| rs6103734  | 0 <sup>b</sup>             | GTCA[ <u>G</u> /A]GA                                    | -378                        |                    |
| rs6103735  | 0 <sup>b</sup>             | TTAA[ <u>G</u> /A]GA                                    |                             | -302b*             |

**Footnote:** <sup>a</sup> Seattle SNPs was used in addition to dbSNP to identify the minor allele frequency (MAF); <sup>b</sup> The MAF appears to be 0% in over 200 individuals that have been genotyped for these two SNPs.
